# Supplementary material for: A single-enzyme, two-step, one-pot synthesis of N-substituted imidazole derivatives containing a glucose branch via combined acylation/Michael addition reactionElectronic supplementary information (ESI) available: experimental section. See http://www.rsc.org/suppdata/cc/b4/b405796a/
Source: Royal Society of Chemistry journal article supplement (doi:10.1039/b405796a), 2004-01-01
Supplement: b405796a.doc [file b405796a.doc]

**# Supplementary Material (ESI) for Chemical Communications**

**# This journal is © The Royal Society of Chemistry 2004**

**Supplementary** **information**

**A single-enzyme, two-step, one-pot synthesis of *N*-substituted imidazole derivatives containing glucose branch *via* combined acylation/Michael addition reaction**

Shi-Ping Yao,*ab* De-Shui Lu,*a* Qi Wu, *a* Ying Cai,*a* Shan-Hao Xu *a* and Xian-Fu Lin**a*

a Department of Chemistry, Zhejiang University, Hangzhou 310027, People’s Republic of China. Fax: 86 571 87952618; Tel: 86 571 87951588; E-mail: llc123@zju.edu.cn

b School of chemistry and chemical engineering, Daqing Petroleum Institute, Daqing 163318, People’s Republic of China. Tel: 86 459 6503788; E-mail: ysp20042001@yahoo.com.cn

**3**: D-Glucose 1.8g (10 mmol) was dissolved in 50ml anhydrous pyridine containing 0.85g (5mmol ) vinyl 3-propenoyloxy propionate. The reaction was initiated by adding 0.5g alkaline protease from *Bacillus subtilis* (10 mg/ml). The suspension was irradiated in the water bath of an ultrasonic cleaner for 10 min (Selecta Ultrasound-H with a heating system, 40kHz of frequency and 100W of power) and then was shaken at 200 rev./min for 36h at 50˚C when essentially complete disappearance of the vinyl 3-propenoyloxy propionate was attained. The reactions were terminated by filtering off the enzyme. The pyridine was removed by rotary evaporation under reduced pressure. The crude product was purified by chromatography on silica gel by eluting with ethyl acetate/methanol/water (25:1.25:1, by vol) (1.27 g, 83%). 1H NMR (D2O, 500 MHz, δ, ppm): 6.35, 5.92 (d, d, 1H, 1H, J=17.30Hz, J=10.56Hz, H2C=), 6.11 (m, 1H, =CH-), 5.12 (d, 0.4H, J=3.62Hz, H-1 of α-D-glucose ), 4.57 (d, 0.6H, J=7.96Hz, H-1 of β-D-glucose ), 4.40-4.20 (m, 4H, H-6, 6′ of β-D-glucose, CH2-O, H-6, 6’ of α-D-glucose), 3.18 (t, 0.6H, J=8.55Hz , H-2 of β-D-glucose), 3.95-3.35 (other α or βH of D-glucose), 2.79 (t, J=3.8 Hz, 2H, O=C-CH2-). 13C NMR (D2O, 500 MHz, δ, ppm): 174.41, 169.48 (C=O), 134.12 (=CH2),128.77 (-CH=), 97.44 (C1 of β-D-glucose), 93.54 (C1 of α-D-glucose), 76.96 (C3 of β-D-glucose), 75.44 (C2 of β-D-glucose), 74.75 (C5 of β-D-glucose), 74.01 (C3 of α-D-glucose), 72.82 (C2 of α-D-glucose), 71.02 (C4 of β-D-glucose), 70.96 (C4 of α-D-glucose), 70.52 (C5 of α-D-glucose), 65.13, 65.03 (C6α,β of D-glucose), 61.87 (-CH2-O), 34.69 (CH2 of O=C-CH2). IR (cm-1 ): 3396 (νO-H), 2924 (υ-CH2-), 1728 (νC=O), 1634, 1619 (νC=C), 1447, 1411 (δCH of -CH2-), 1058, 1186, 1298 (νC-O), 769, 809, 910 ( δCH of =CH2 ).

**5a**: 6-O-(β-propenoyloxy-propionyl)-D-glucose (Michael acceptor) 1.0g (3mmol ) and imidazole (Michael donor) 0.4g (6mmol ) were dissolved in 15ml anhydrous pyridine, The reaction was initiated by adding 0.15g alkaline protease from *Bacillus subtilis*. The suspension was irradiated in the water bath of an ultrasonic cleaner for 10 min (Selecta Ultrasound-H with a heating system, 40kHz of frequency and 100W of power) and then was shaken at 200 rev./min for 24h at 50˚C when essentially complete disappearance of the 6-O-(β-propenoyloxy-propionyl)-D-glucose was attained. The reactions were terminated by filtering off the enzyme. The pyridine was removed by rotary evaporation under reduced pressure. The crude product was purified by chromatography on silica gel by eluting with ethyl acetate/methanol/water (11:3:1, by vol) (0.84 g, 69%). 1H NMR (D2O, 500 MHz, δ, ppm): 7.97 (d, 1H, J=7.11 Hz, C(2)-H, imidazole), 7.19 (s, 1H, C(4/5)-H, imidazole), 7.06 (s, 1H, C(4/5)-H, imidazole), 5.09 (d, 0.4H, J=3.73 Hz, H-1 of α-D-glucose), 4.54 (d, 0.6H, J=7.98Hz, H-1 of β-D-glucose), 4.33-4.15 (m, 6H, H-6, 6’ of β-D-glucose, -CH2-O-, -CH2-N , H-6, 6’ of α-D-glucose), 3.13 (t, 0.6H, J=8.49Hz , H-2 of β-D-glucose), 3.93-3.32 (other αH or βH of D-glucose), 2.85, 2.65 (m, m, 4H, O=C-CH2, O=C-CH2). 13C NMR (D2O, 500 MHz, δ, ppm): 172.97, 172.57 (C=O), 136.95 (C-2, imidazole), 124.88 (C-5, imidazole), 120.63 (C-4, imidazole), 96.05 (C1 of β-D-glucose), 92.17 (C1 of α-D-glucose), 75.54 (C3 of β-D-glucose), 74.06 (C2 of β-D-glucose), 73.31 (C5 of β-D-glucose), 72.59 (C3 of α-D-glucose), 71.44 (C2 of α-D-glucose), 69.57 (C4 of α-D-glucose), 69.47 (C4 of β-D-glucose), 69.13 (C5 of α-D-glucose), 63.70, 63.68 (C6α,β of D-glucose), 60.72 (-CH2-O), 43.11 (-CH2-N), 34.82, 33.14 (CH2 of O=C-CH2). IR (cm-1 ): 3346 (νO-H), 2924 (ν-CH2-),1733 (νC=O), 1577 (νC=C), 1515 (νC=N).

**5b**: This was prepared from 6-O-(β-propenoyloxy-propionyl)-D-glucose 1.0g (3mmol ) and 4-nitro-1*H*-imidazole 0.68g (6mmol ) by the same method as **5a**. (1.38 g, 80%).  1H NMR (D2O, 500 MHz, δ, ppm): 8.14 (s, 1H, C(5)-H, imidazole), 7.70 (s, 1H, C(2)-H, imidazole), 5.09 (d, 0.4H, J=3.73 Hz, H1 of α-D-glucose), 4.57 (d, 0.6H, J=7.98Hz , H1 of β-D-glucose), 4.35-4.16 (m, 6H, H6, 6’ of β-D-glucose, -CH2-O-, -CH2-N, H6, 6’ of α-D-glucose), 3.16 (t, 0.6H, J=8.52Hz, H2 of β-D-glucose), 3.94-3.33 (other αH or βH of D-glucose), 2.93, 2.69 (m, m, 4H, O=C-CH2). 13C NMR (D2O, 500 MHz, δ, ppm): 172.99, 172.35 (C=O), 146.55 (C-4, imidazole), 137.96 (C-2, imidazole), 121.75 (C-5, imidazole), 96.10 (C1 of β-D-glucose), 92.22 (C1 of α-D-glucose), 75.60 (C3 of β-D-glucose), 74.11 (C2 of β-D-glucose), 73.35 (C5 of β-D-glucose), 72.64 (C3 of α-D-glucose), 71.49 (C2 of α-D-glucose), 69.67 (C4 of α-D-glucose), 69.57 (C4 of β-D-glucose), 69.15 (C5 of α-D-glucose), 63.80, 63.75 (C6α,β of D-glucose), 60.84 (-CH2-O), 43.65 (-CH2-N), 34.64, 33.20 (CH2 of O=C-CH2-). IR (cm-1): 3363 (νO-H), 2926 (ν-CH2-), 1733 (νC=O), 1545 (νC=C), 1521 (νC=N).

**5c**: This was prepared from 6-O-(β-propenoyloxy-propionyl)-D-glucose 1.0g (3mmol ) and 2-methyl-4-nitro-1H-imidazole 0.76g (6mmol ) by the same method as **5a**. (1.08 g, 76%).  1H NMR (D2O, 500 MHz, δ, ppm): 8.00 (d, 1H, J=3.11 Hz, C(4)-H, imidazole), 5.09 (d, 0.4H, J=3.70 Hz, H1 of α-D-glucose), 4.55 (d, 0.6H, J=7.98Hz, H1 of β-D-glucose), 4.31-4.12 (m, 6H, H6, 6’ of β-D-glucose, -CH2-O, -CH2-N, H6, 6’of α-D-glucose), 3.15 (t, 0.6H, J=8.54Hz, H2 of β-D-glucose), 3.92-3.31 (other αH or βH of D-glucose ), 2.87, 2.65 (m, m, 4H, O=C-CH2). 13C NMR (D2O, 500 MHz, δ, ppm): 173.13, 172.51 (C=O), 147.13 (C-4, imidazole), 145.11 (C-2, imidazole), 122.35 (C-5, imidazole), 96.33 (C1 of β-D-glucose), 92.44 (C1 of α-D-glucose), 75.84 (C3 of β-D-glucose), 74.34 (C2 of β-D-glucose), 73.57 (C5 of β-D-glucose), 72.88 (C3 of α-D-glucose), 71.72 (C2 of α-D-glucose), 69.92 (C4 of α-D-glucose), 69.82 (C4 of β-D-glucose), 69.36 (C5 of α-D-glucose), 64.04 (C6α,β of D-glucose), 61.07 (-CH2-O-), 42.62 (-CH2-N), 34.21, 33.40 (CH2 of O=C-CH2), 12.27 (-CH3).

**
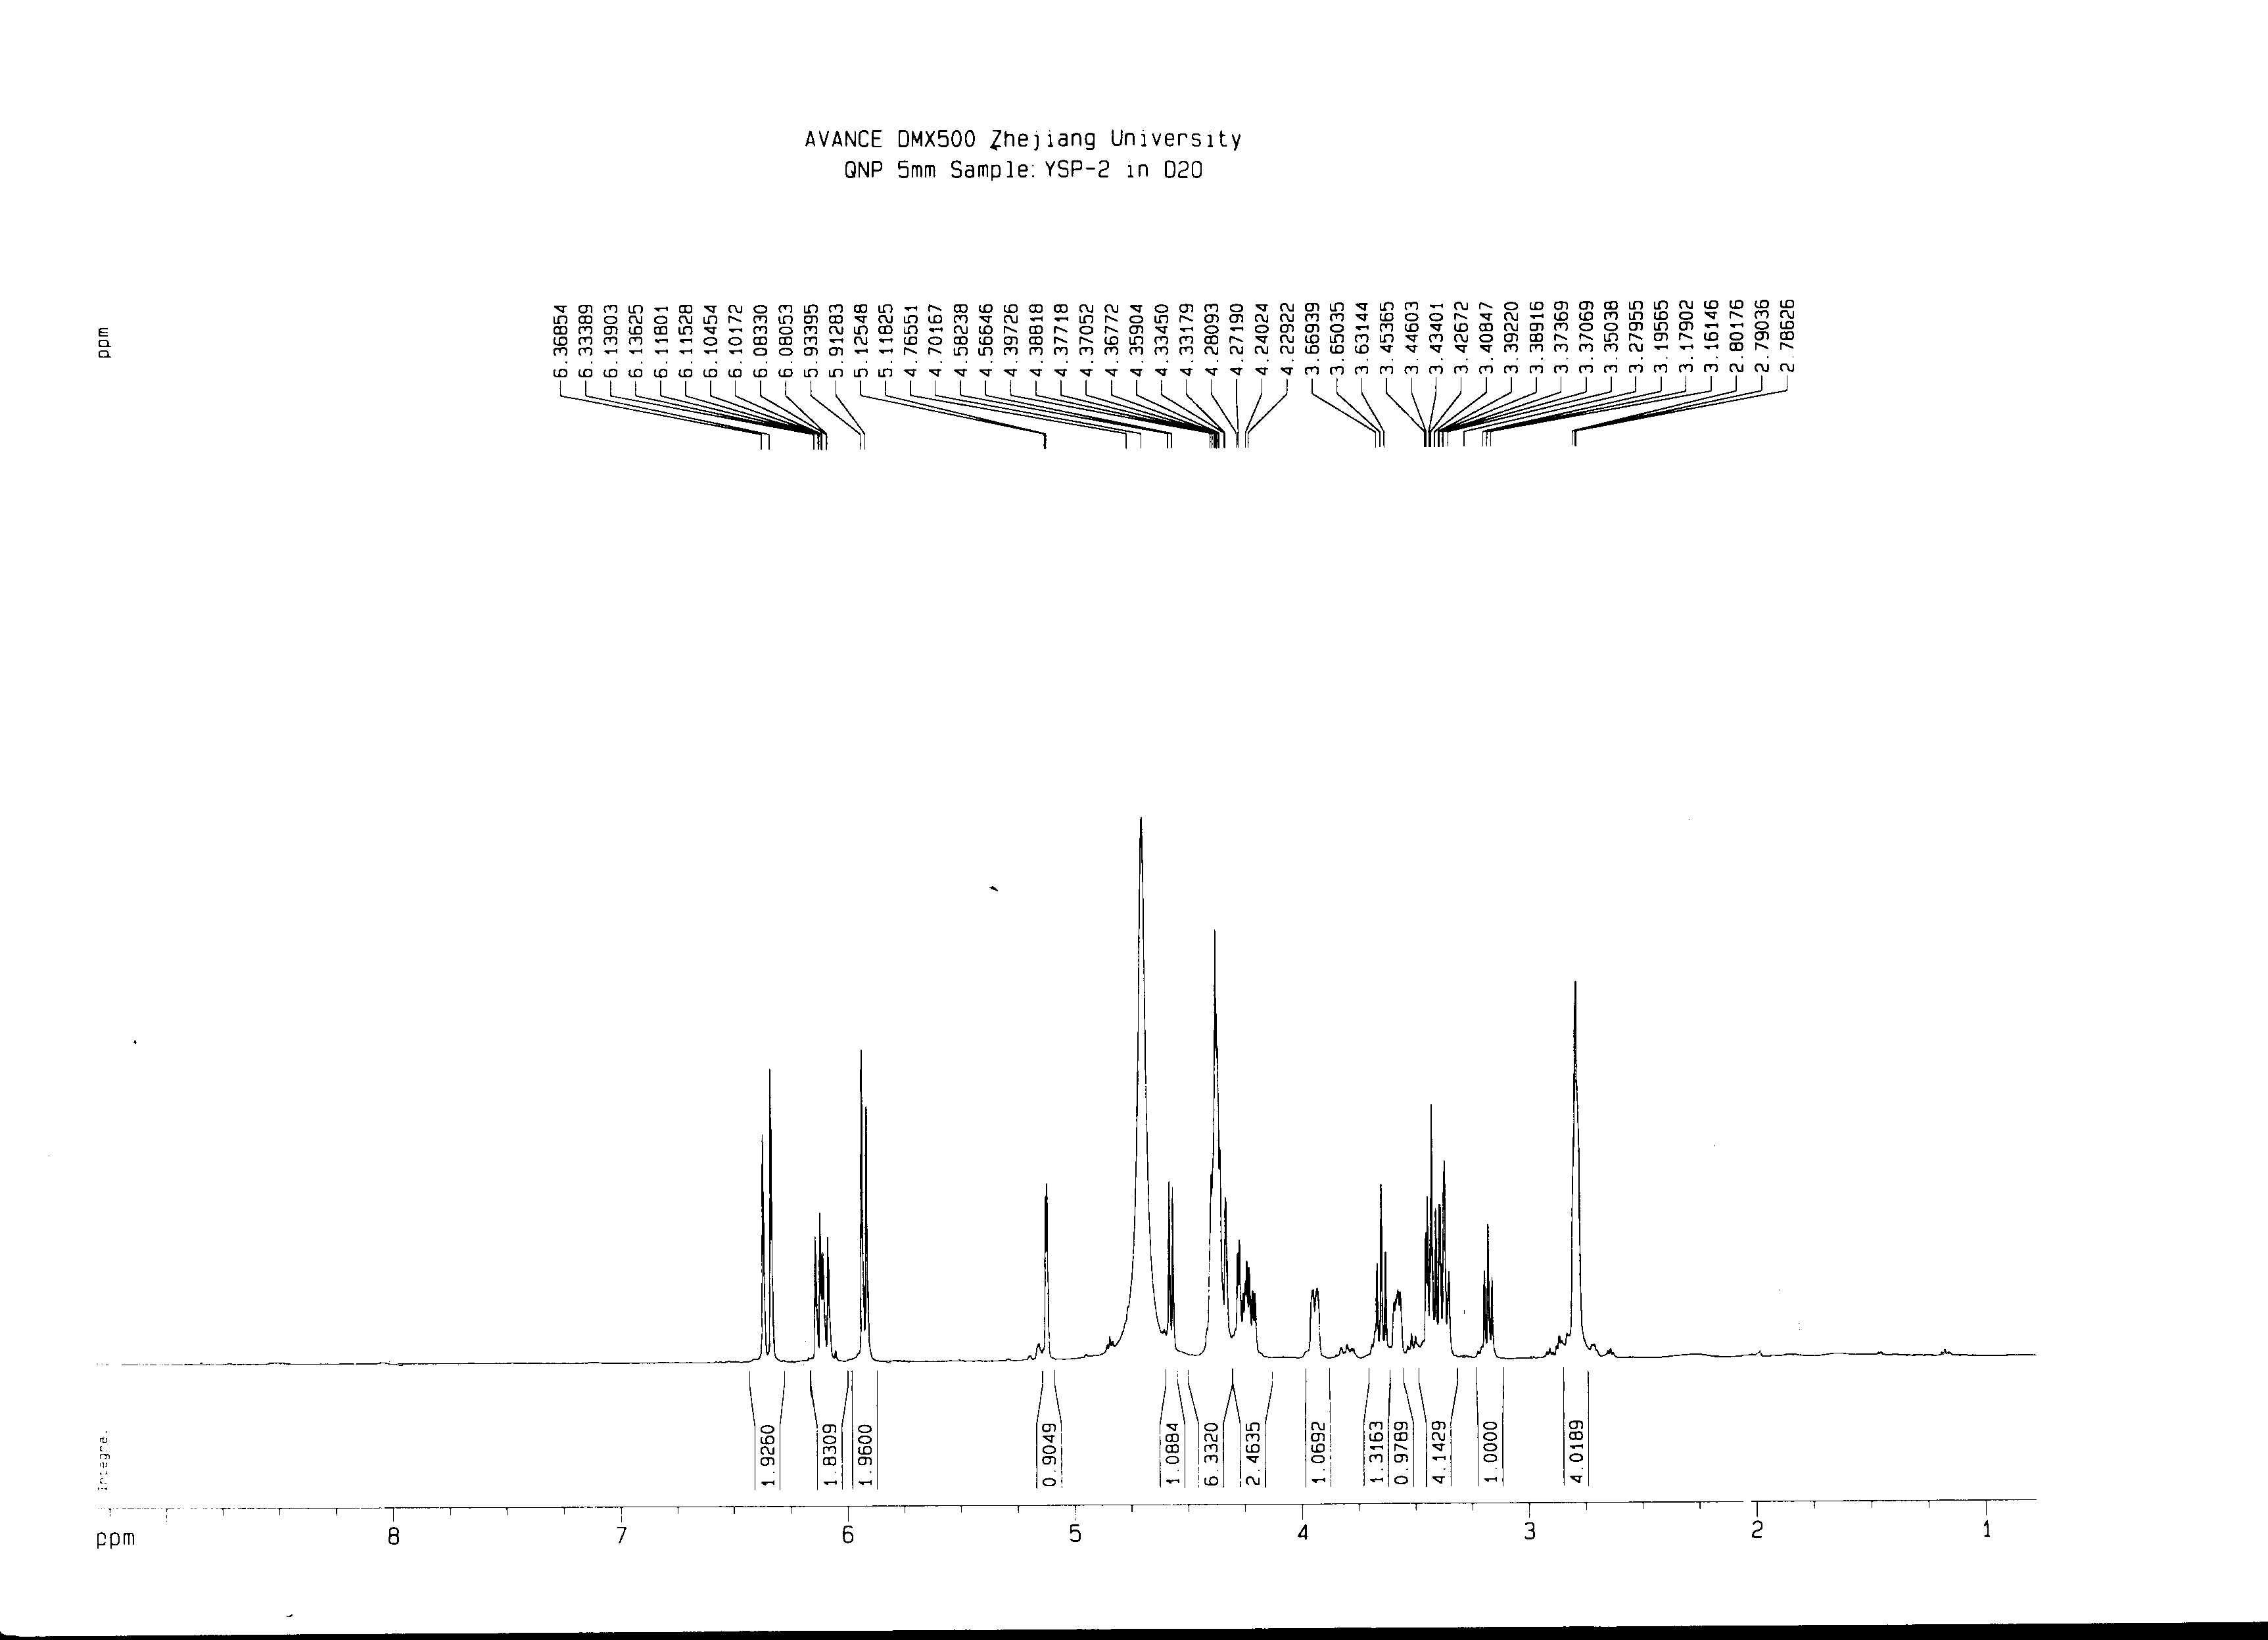
**


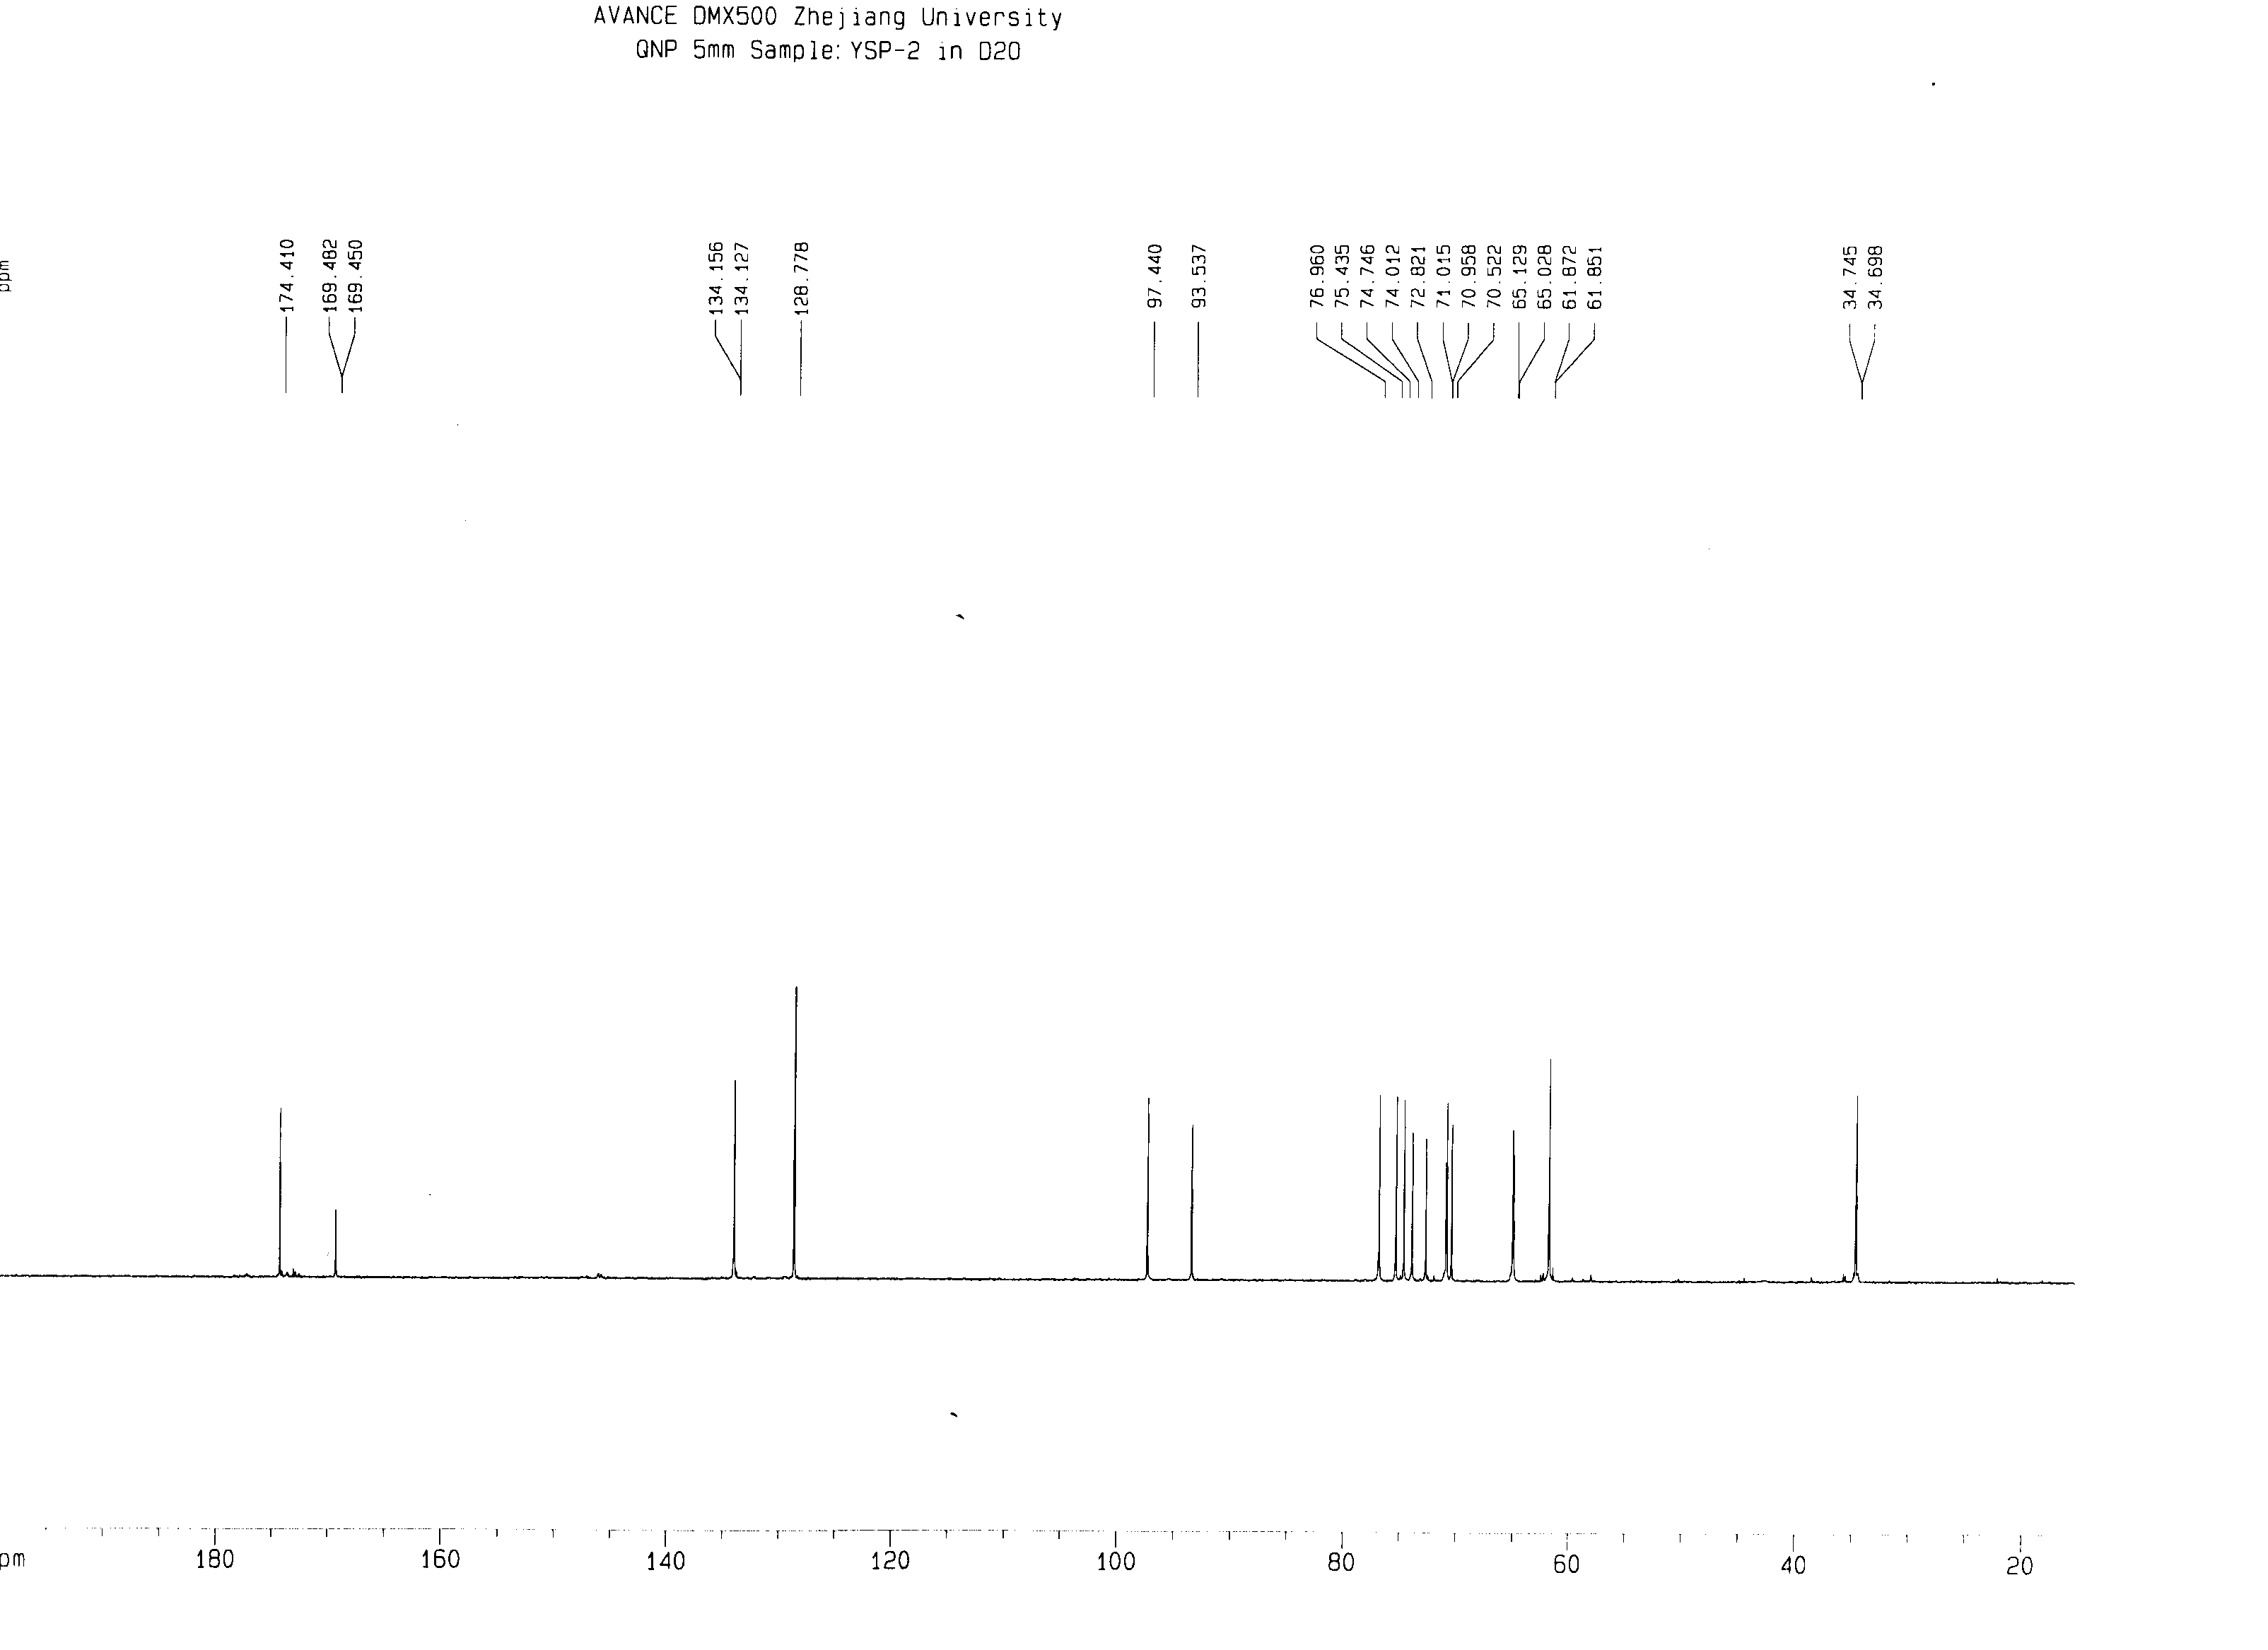


**
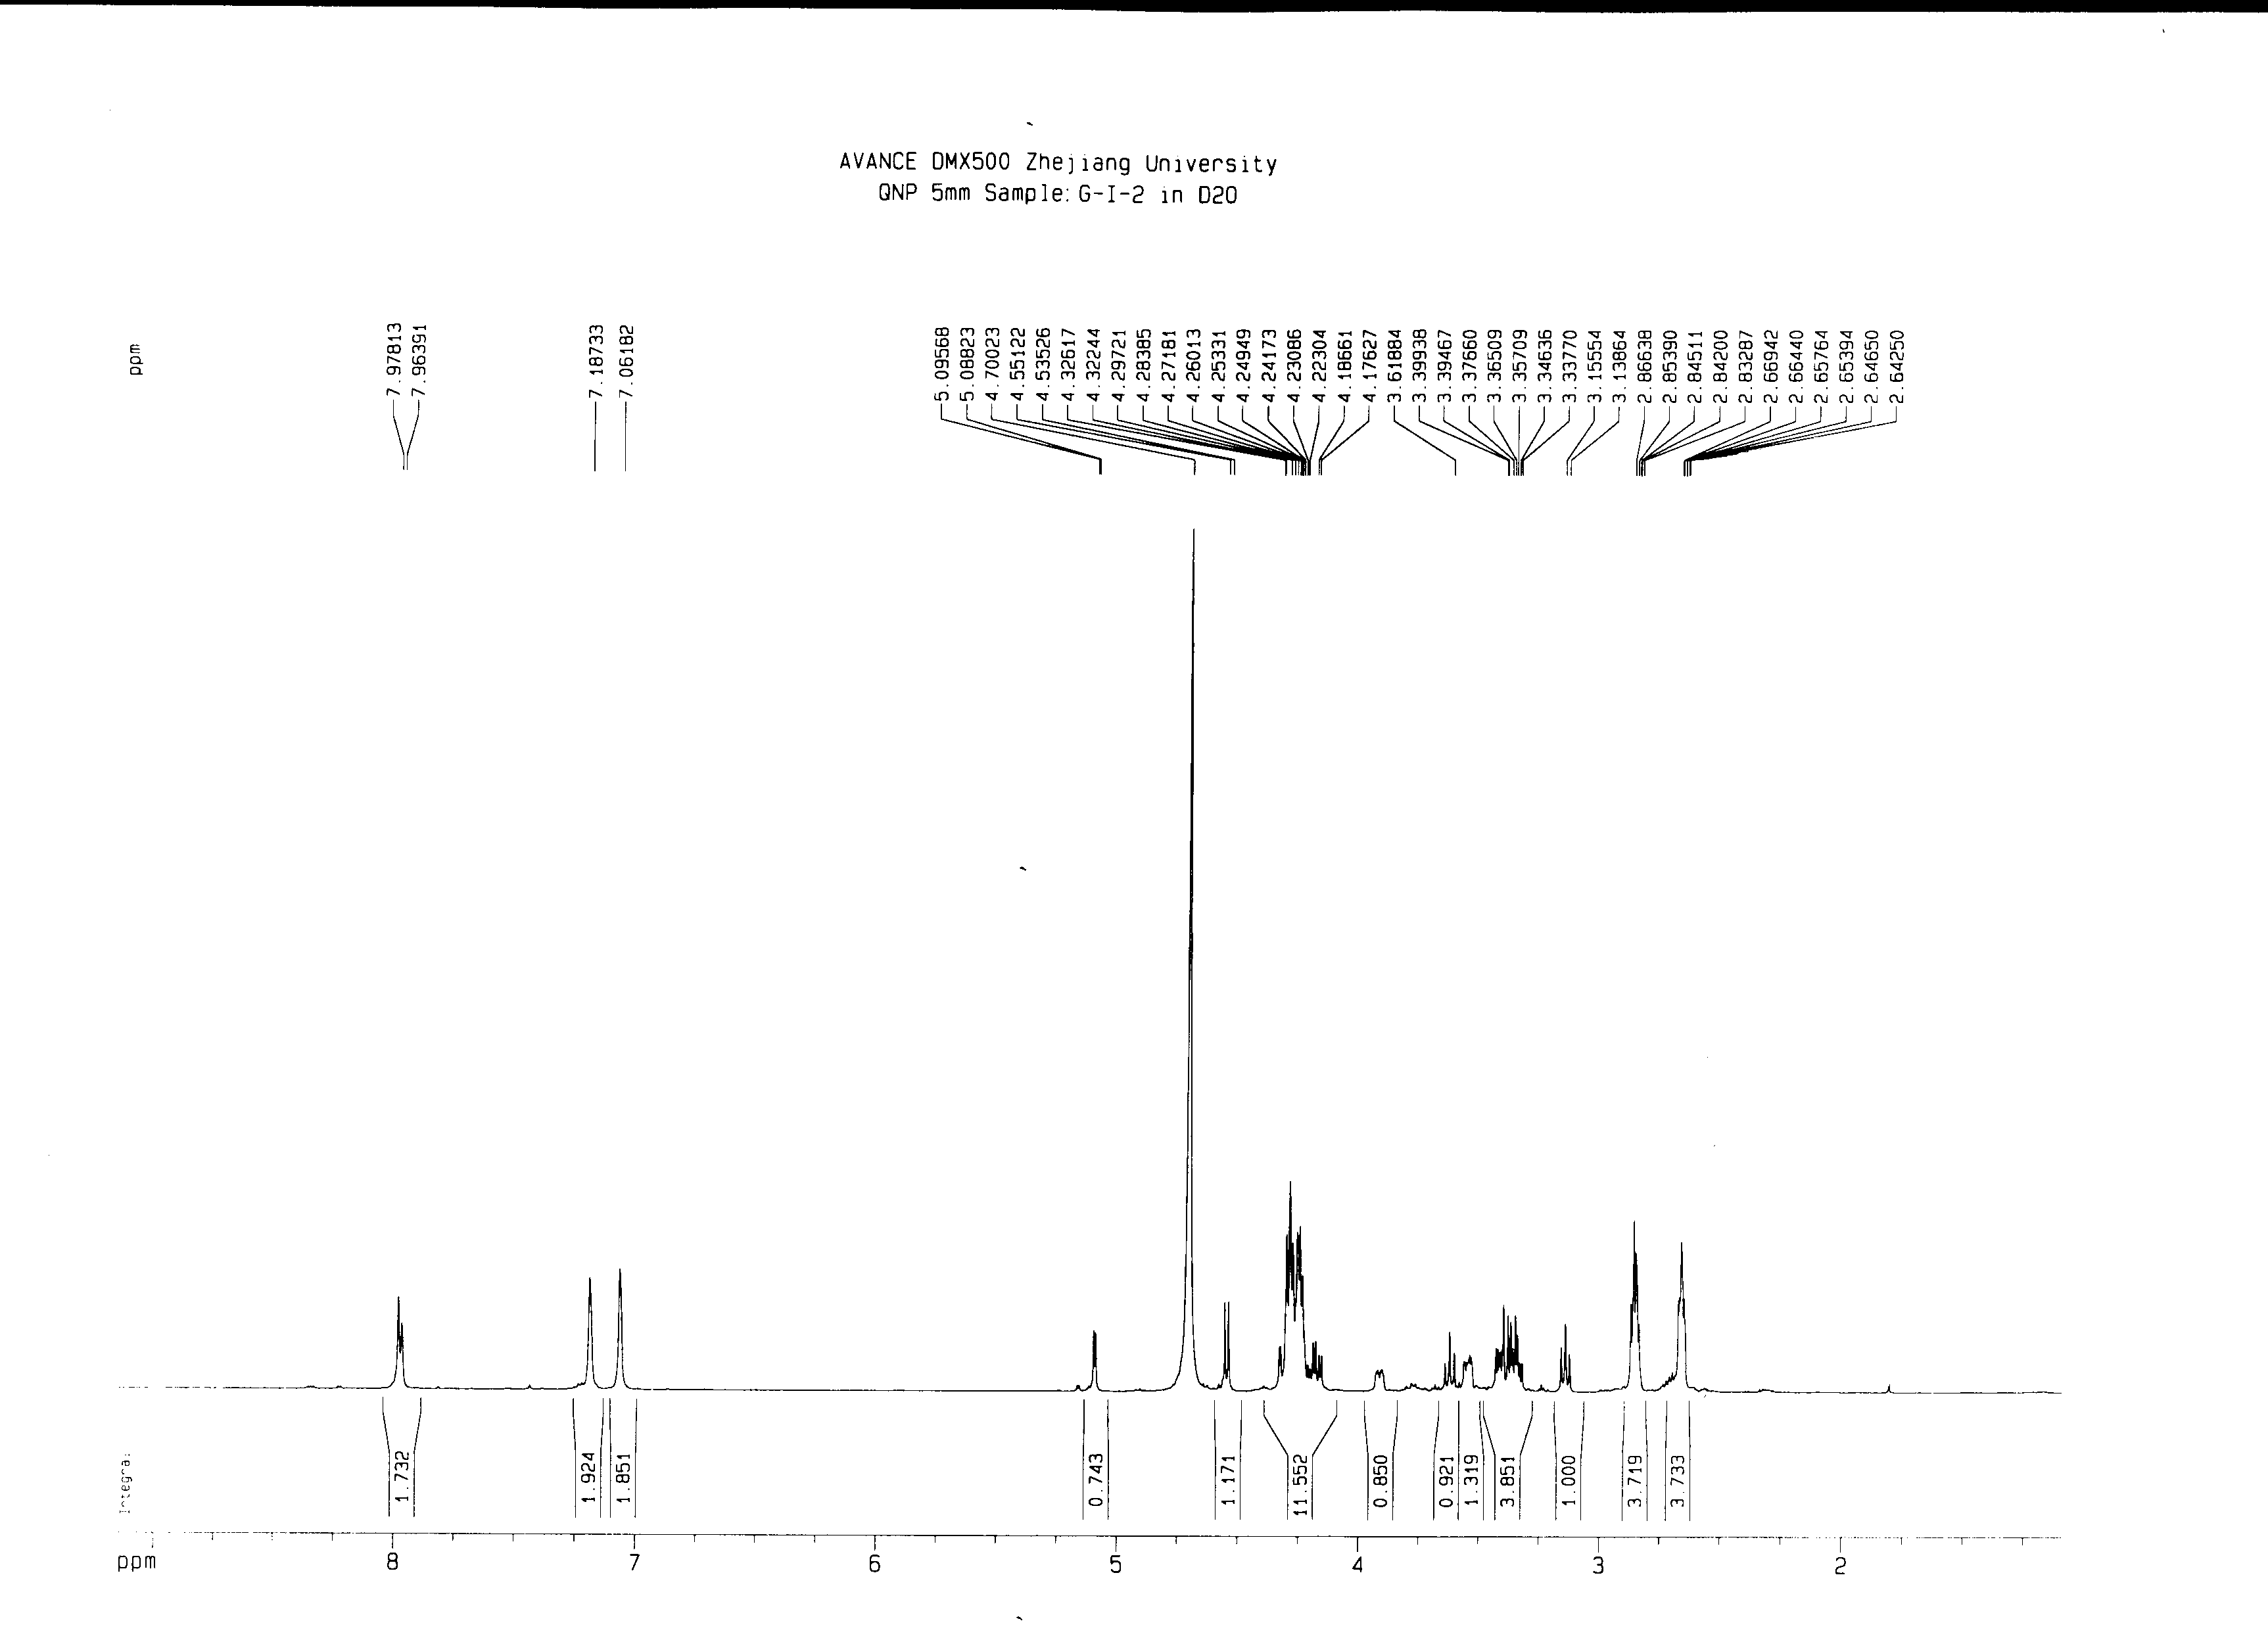
**

**
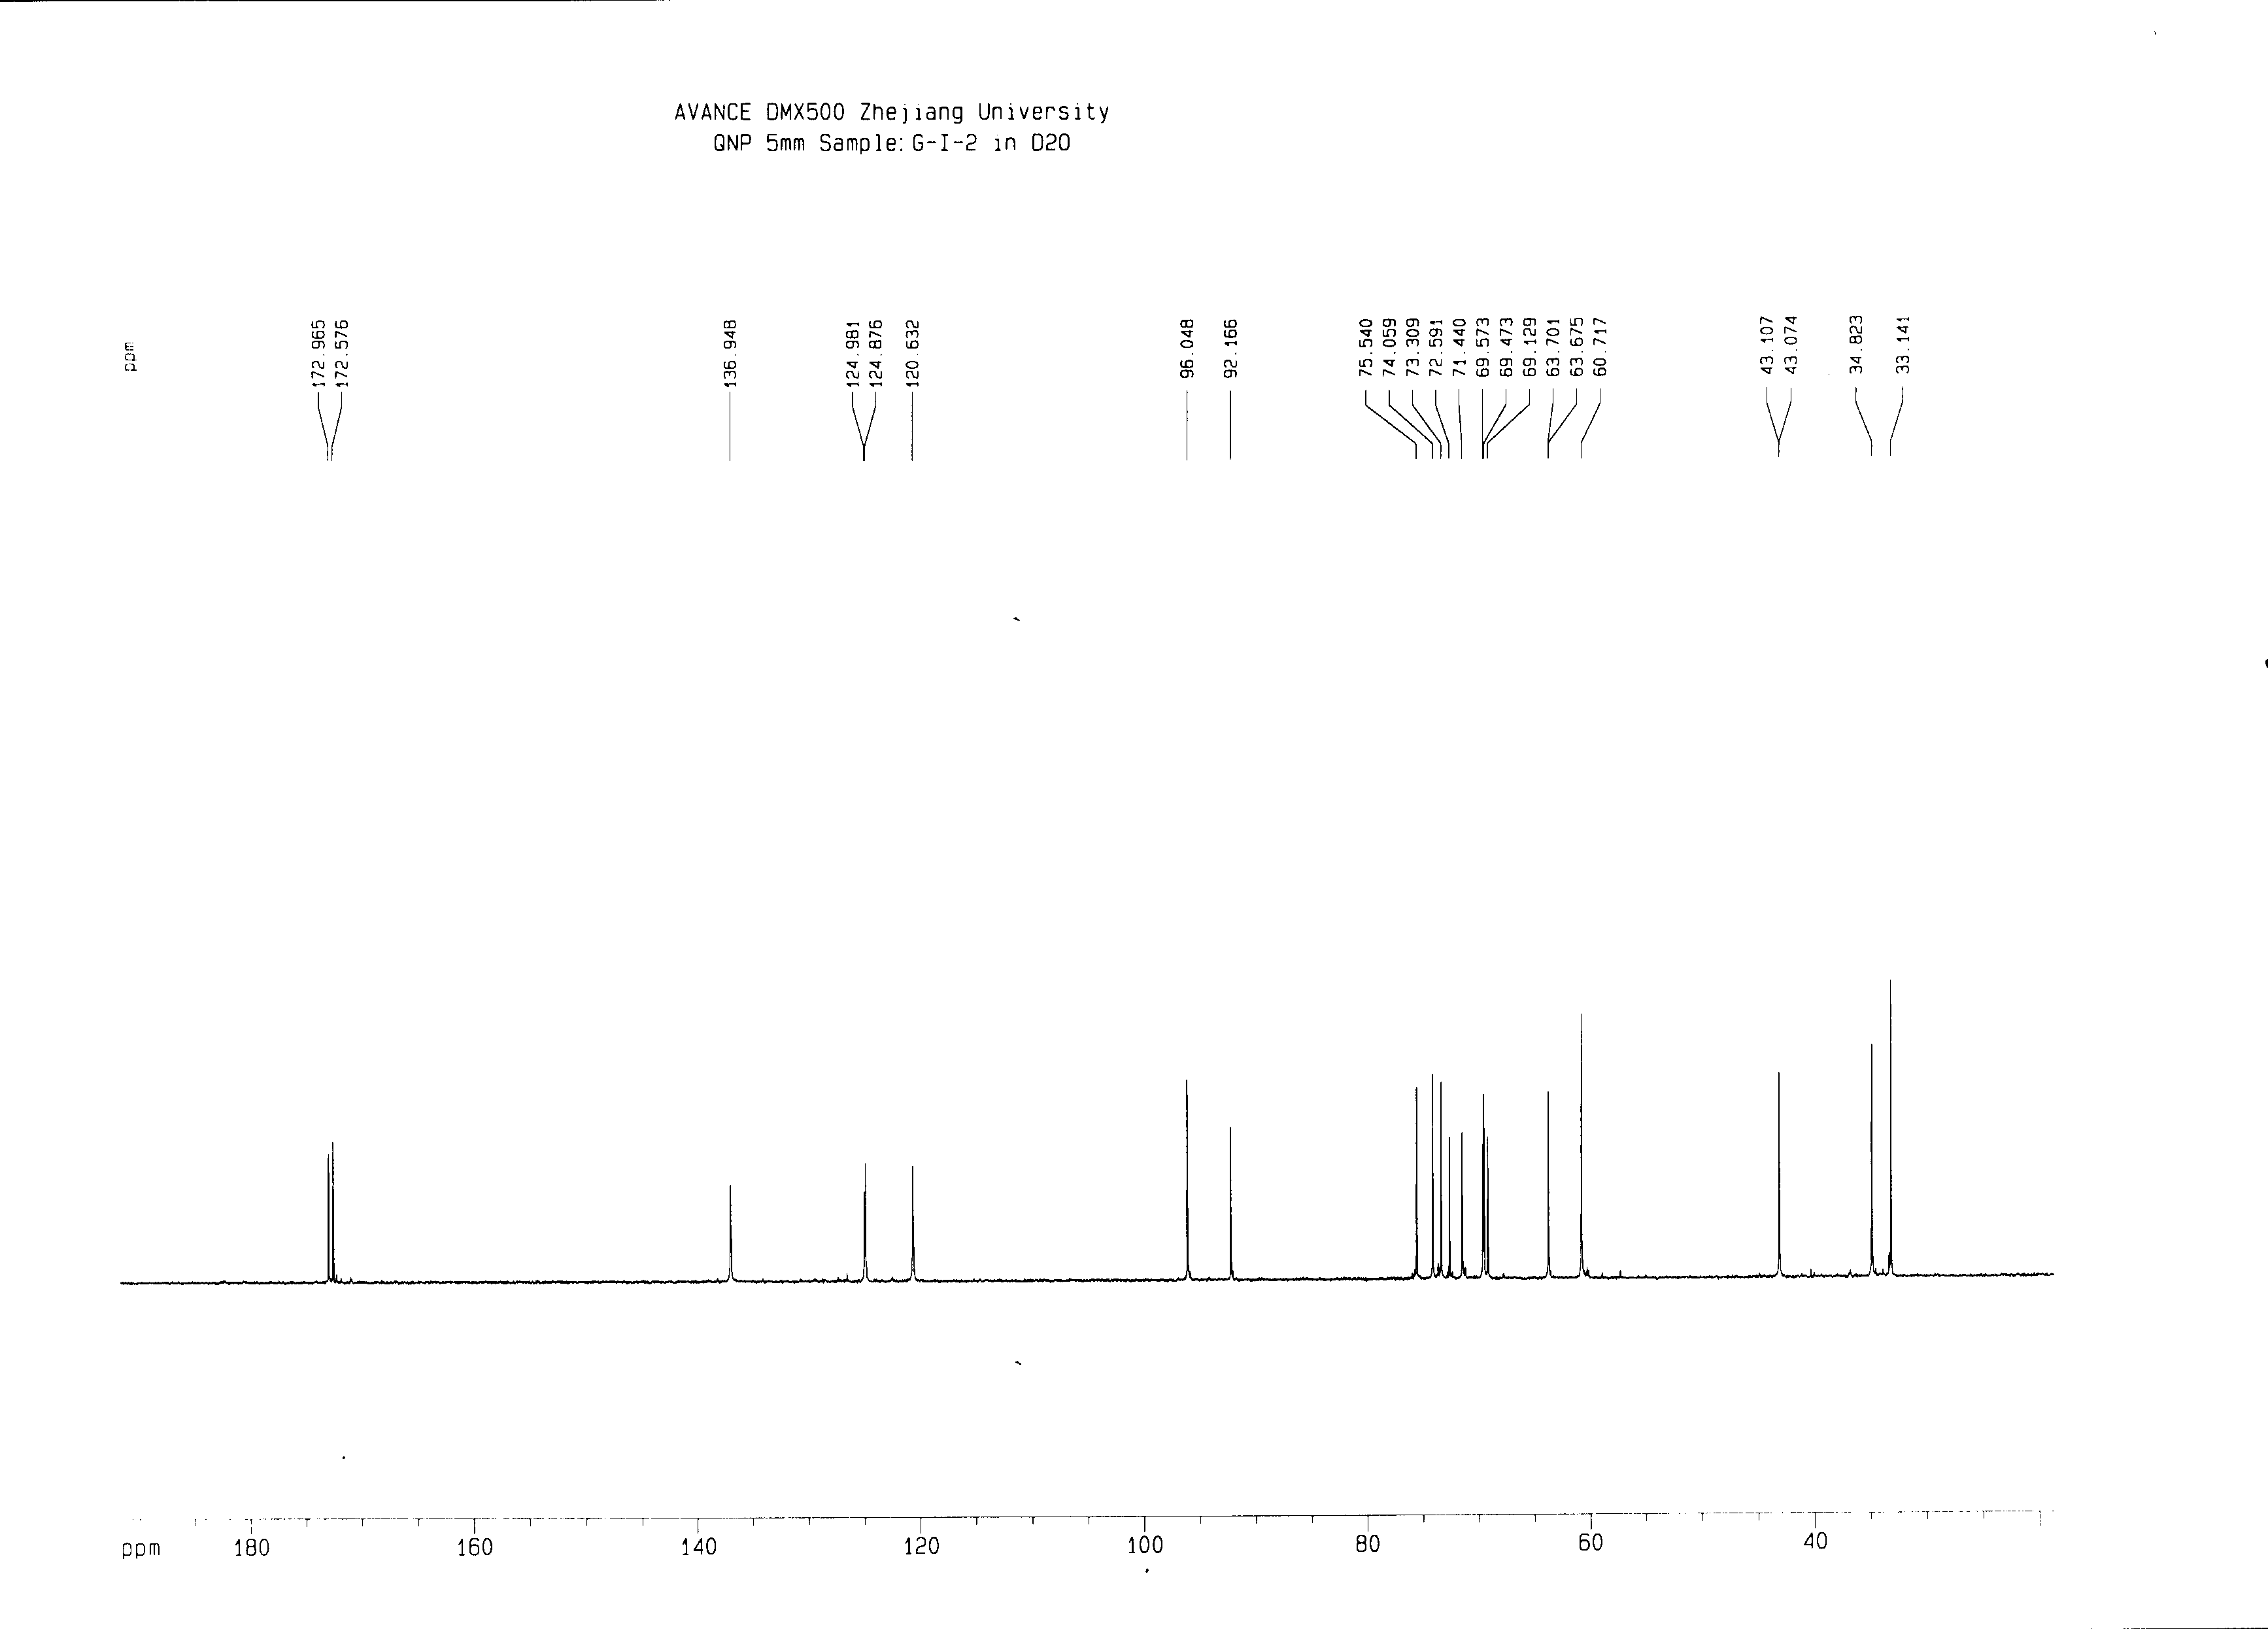
**

**
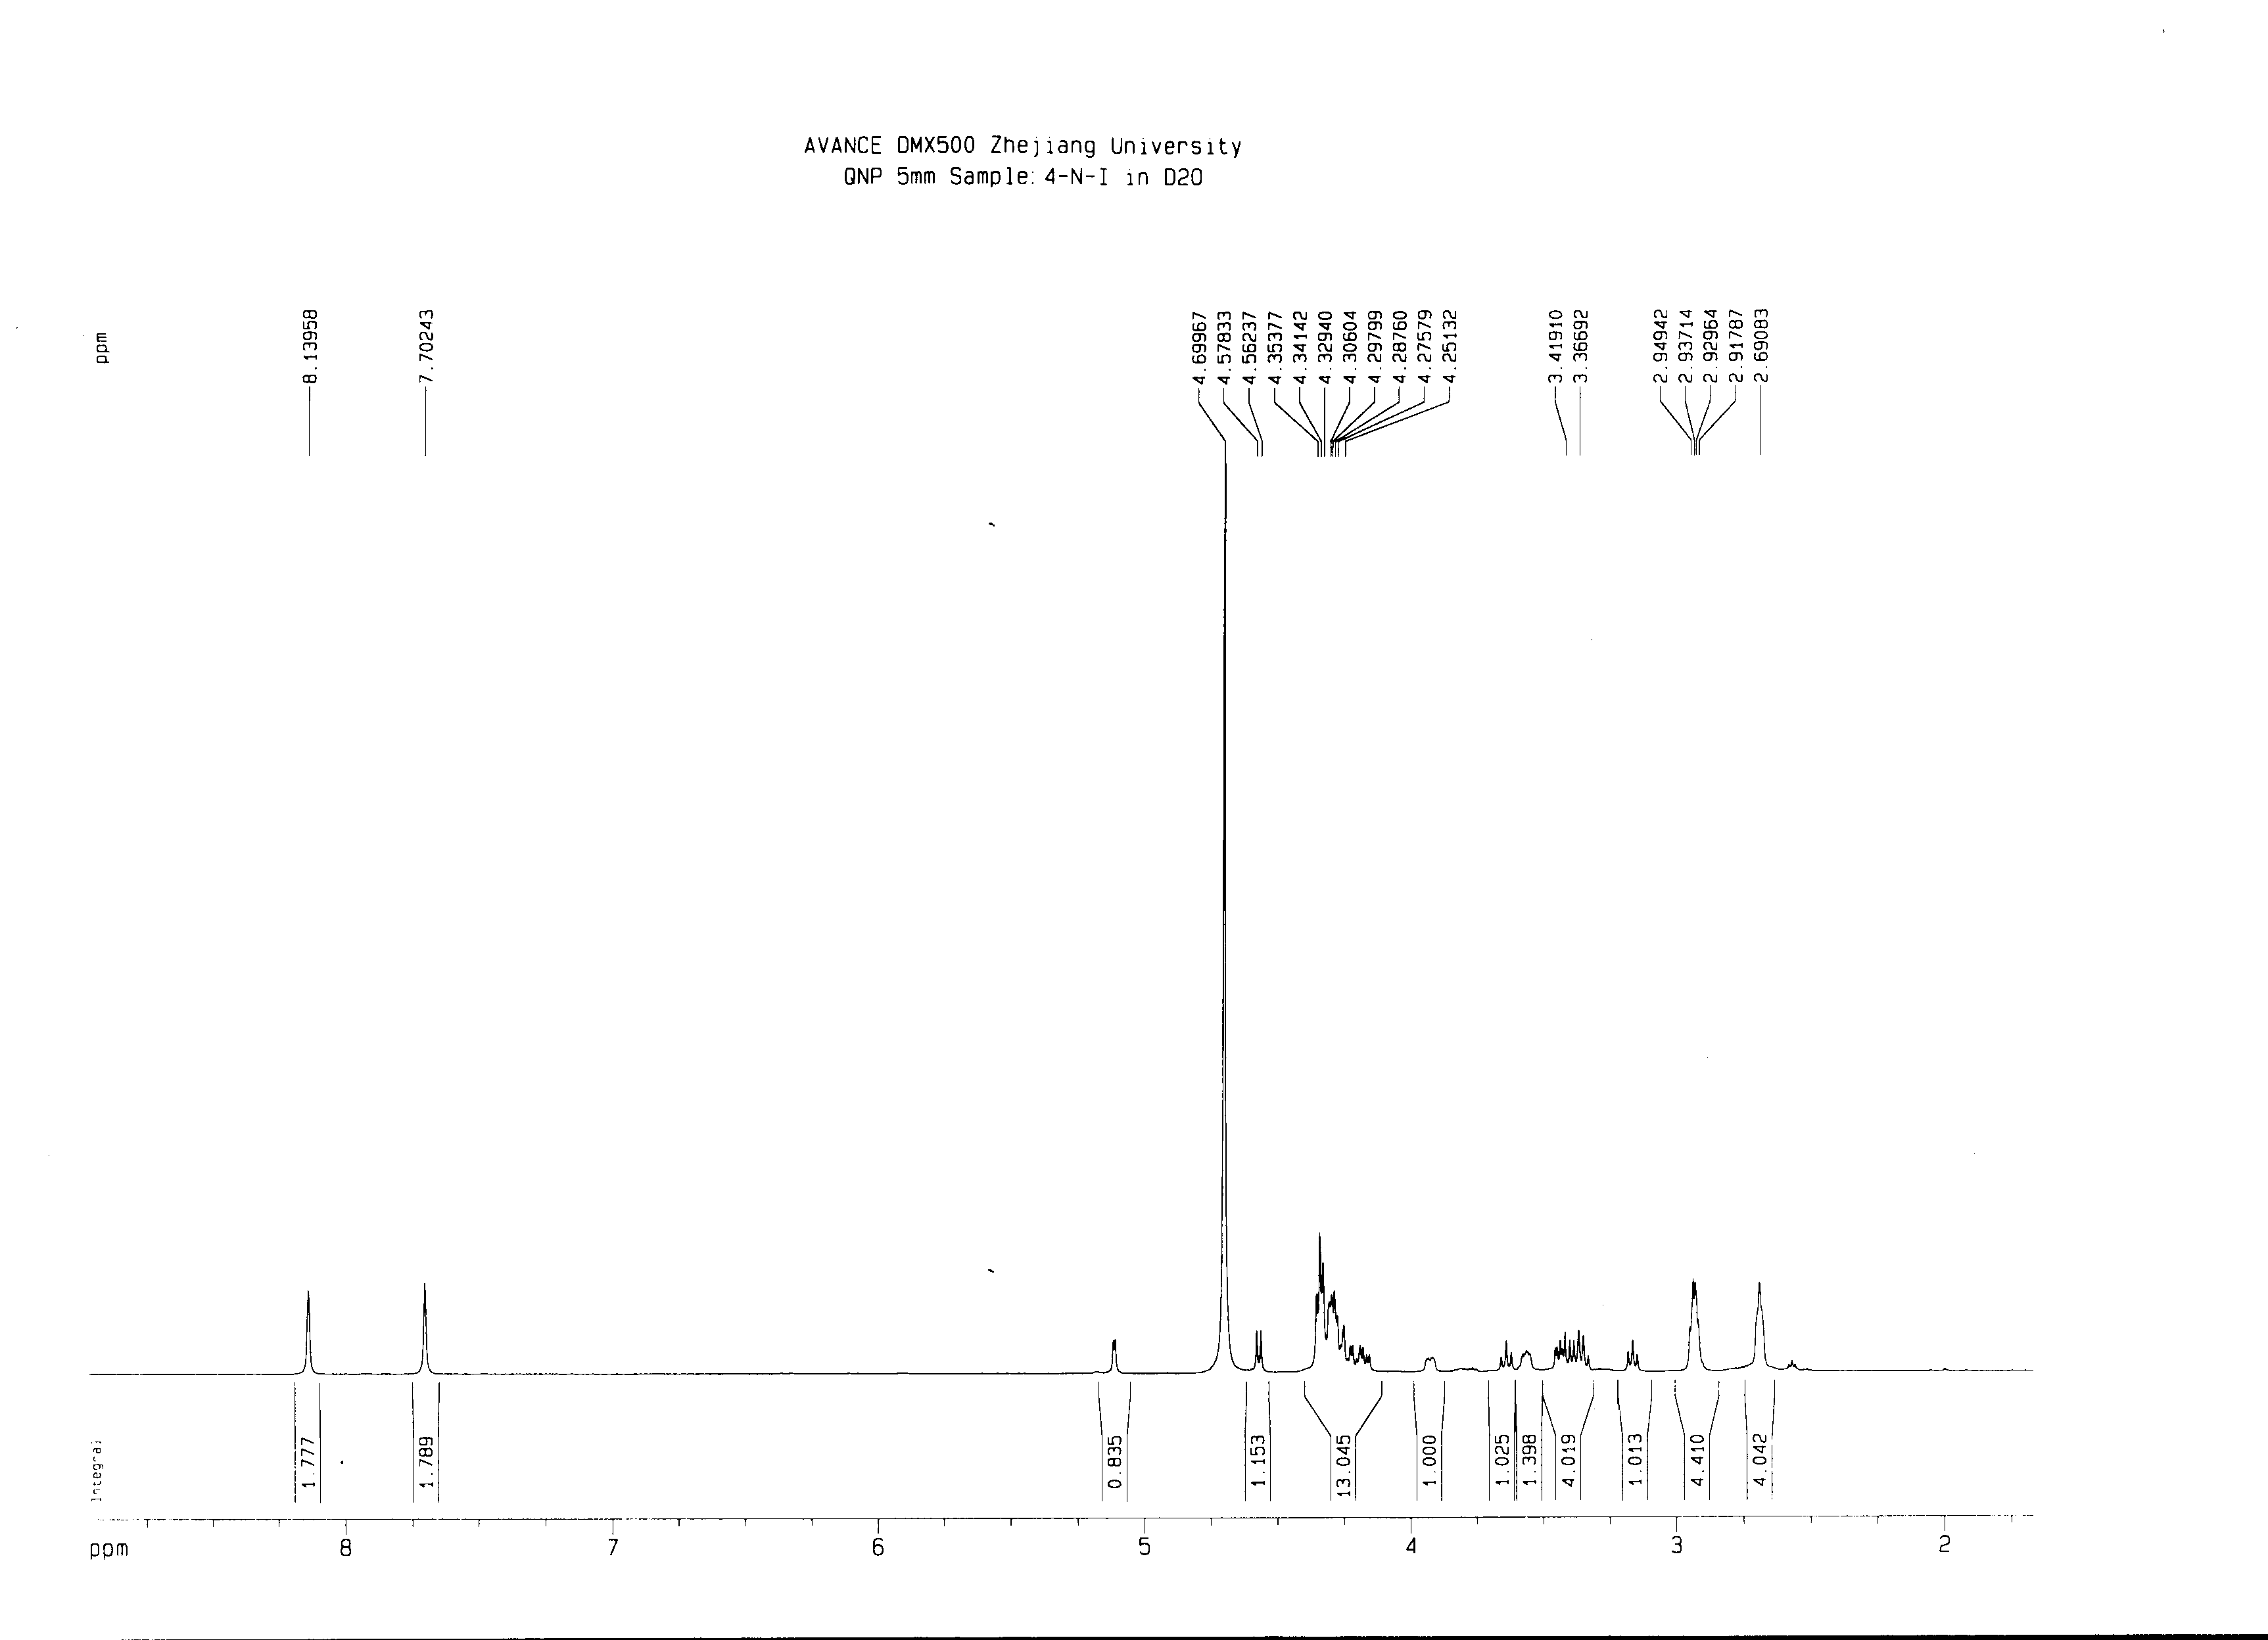
**

**
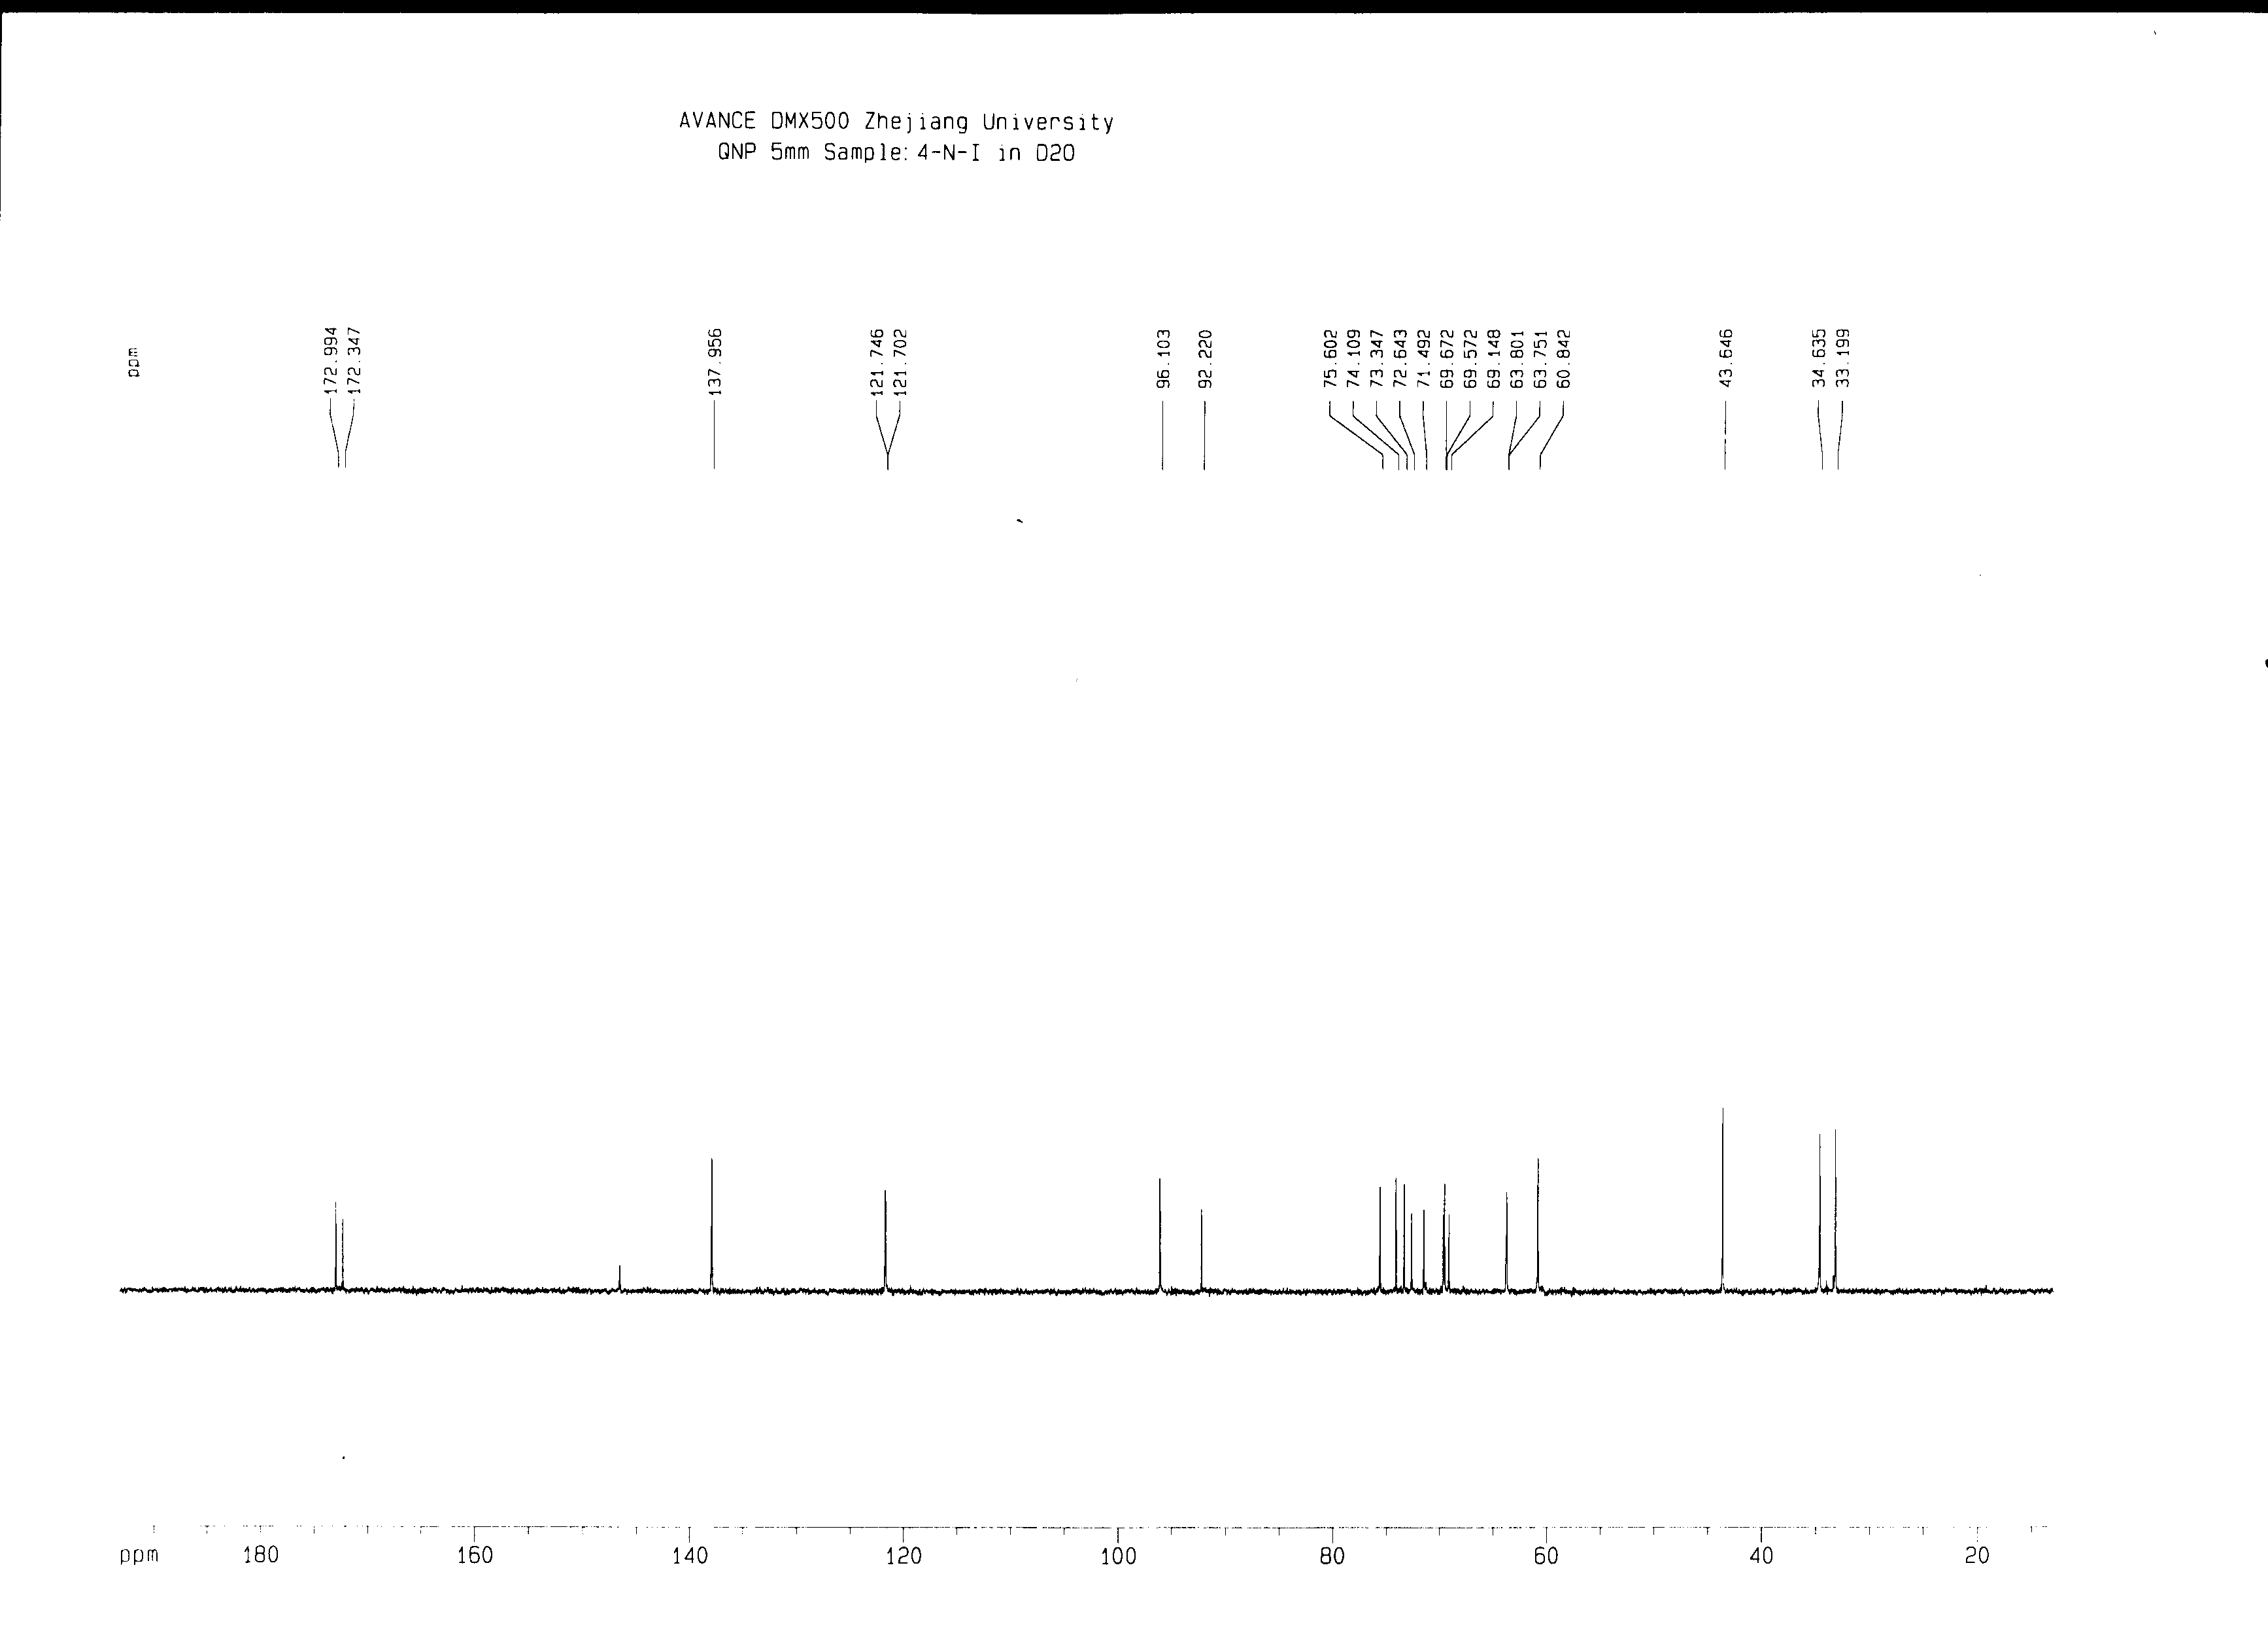
**

**
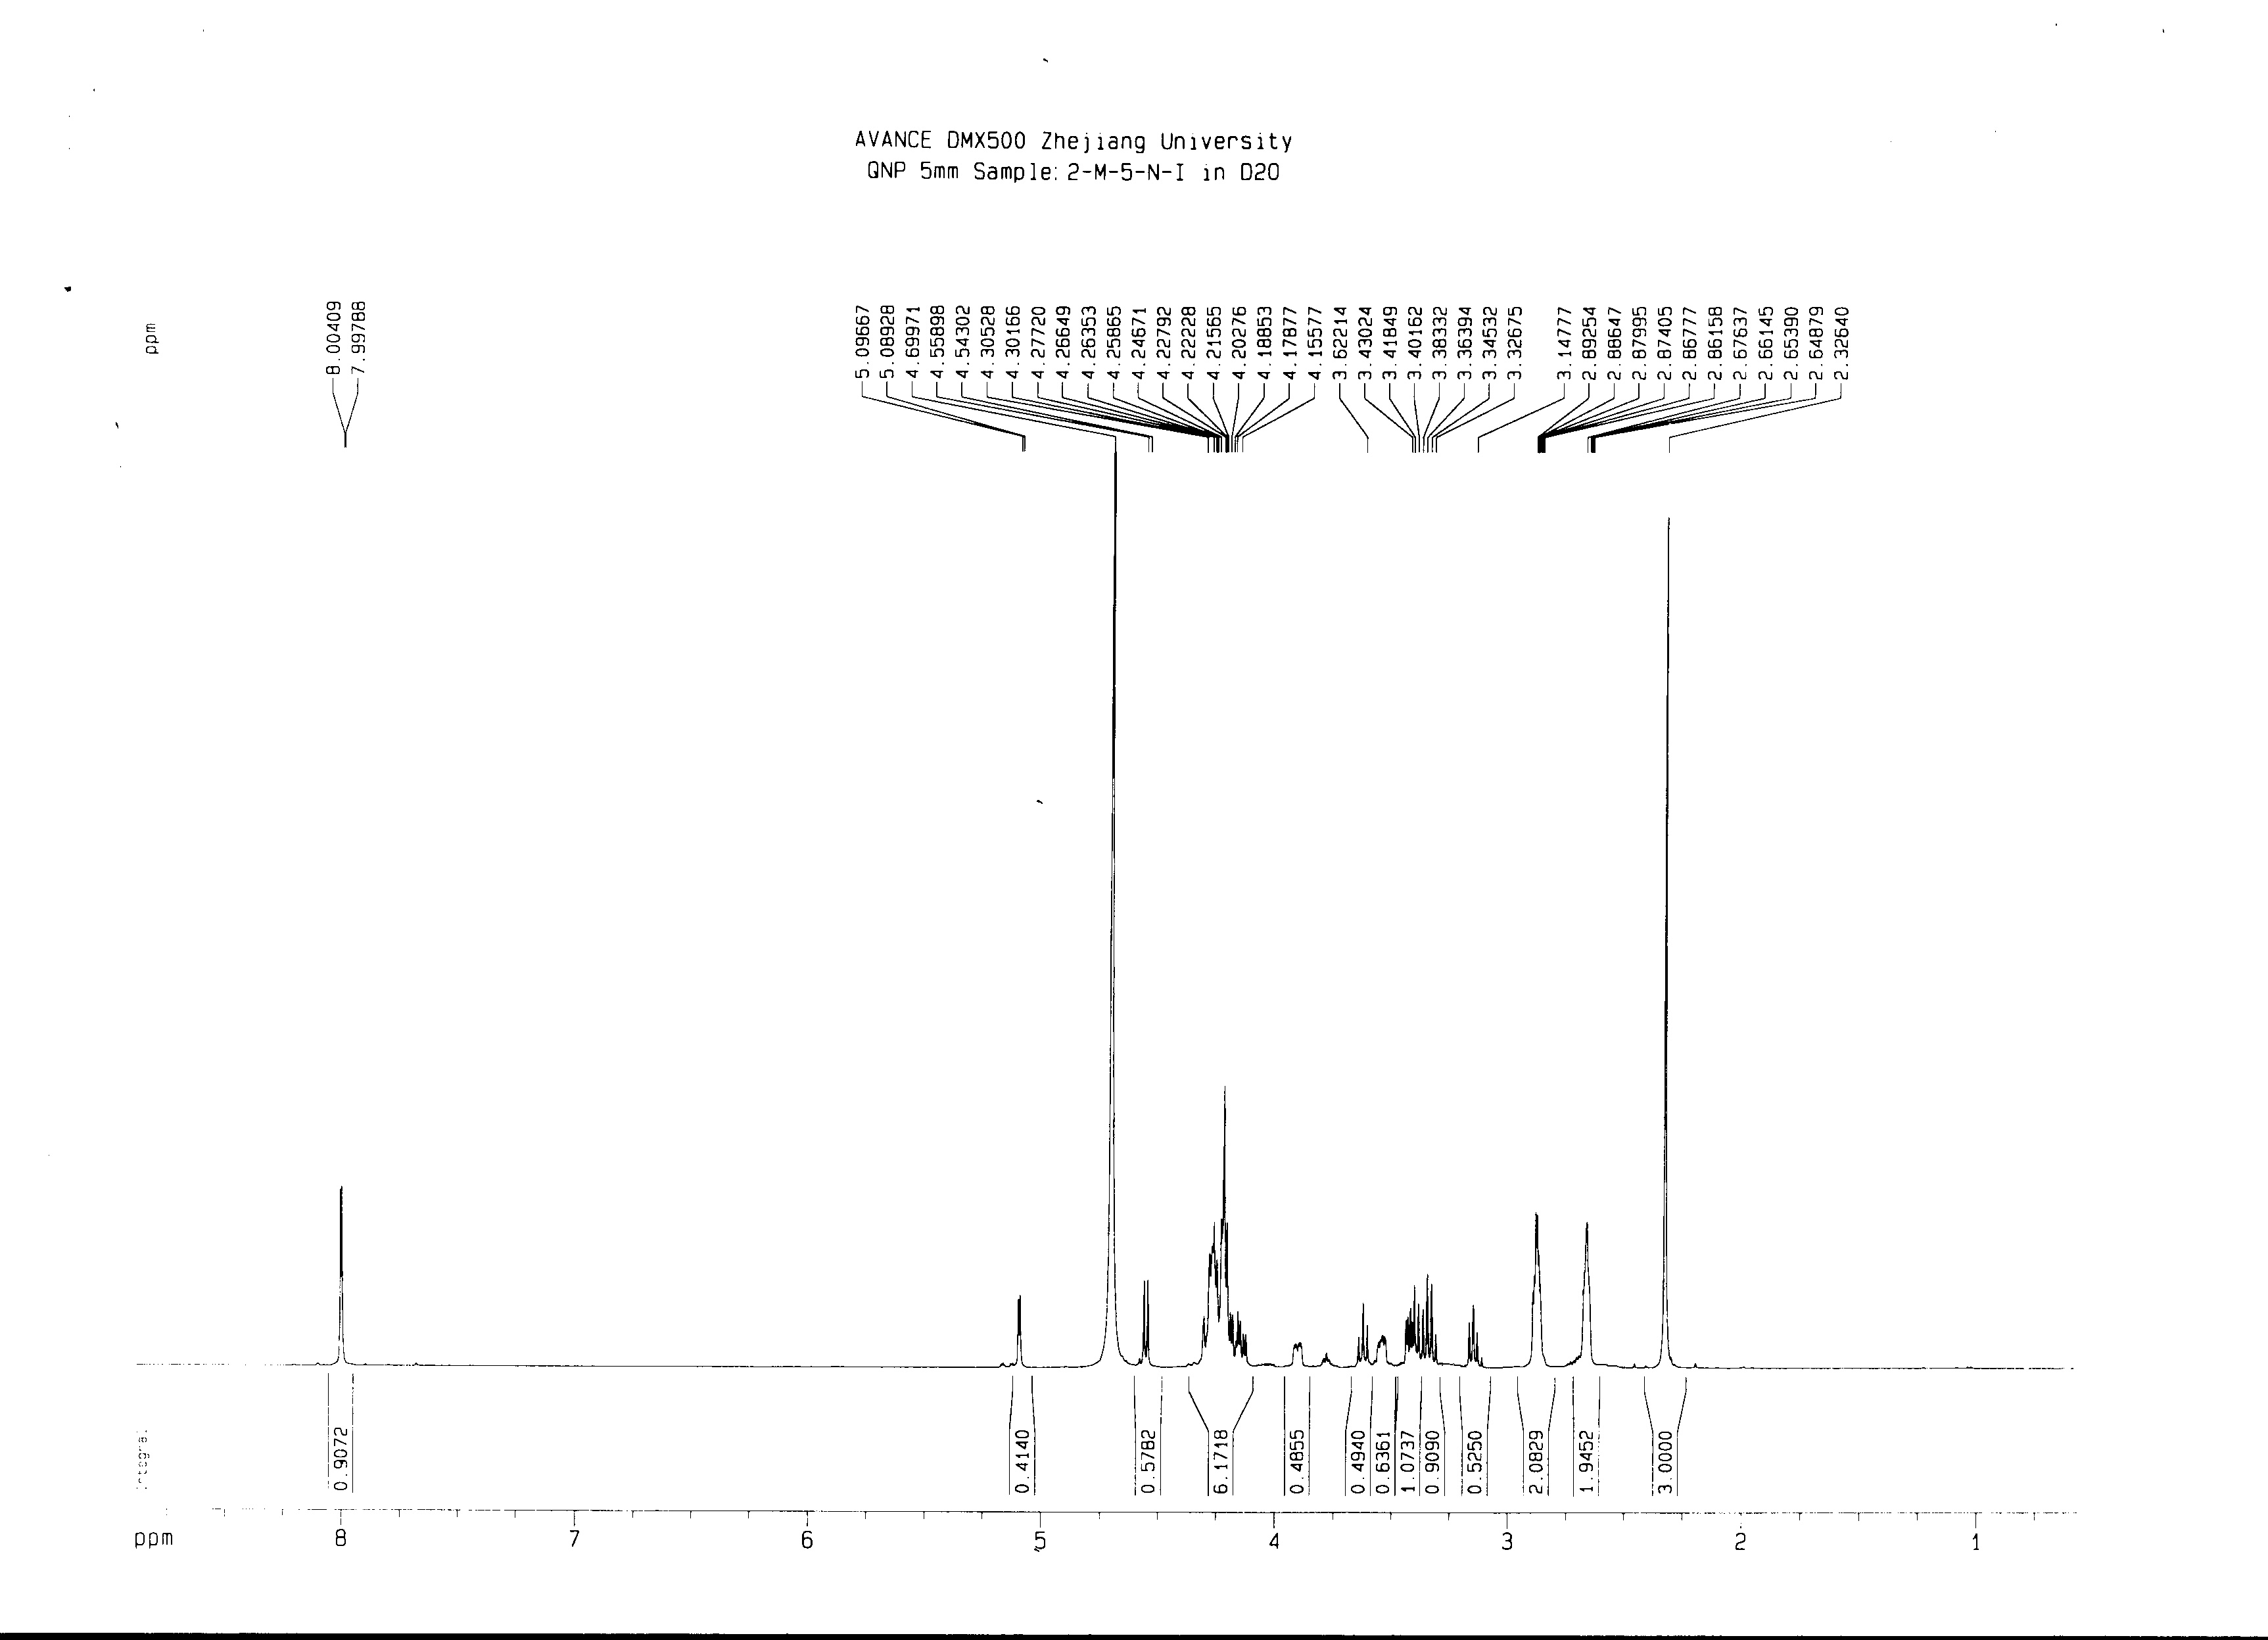
**

**
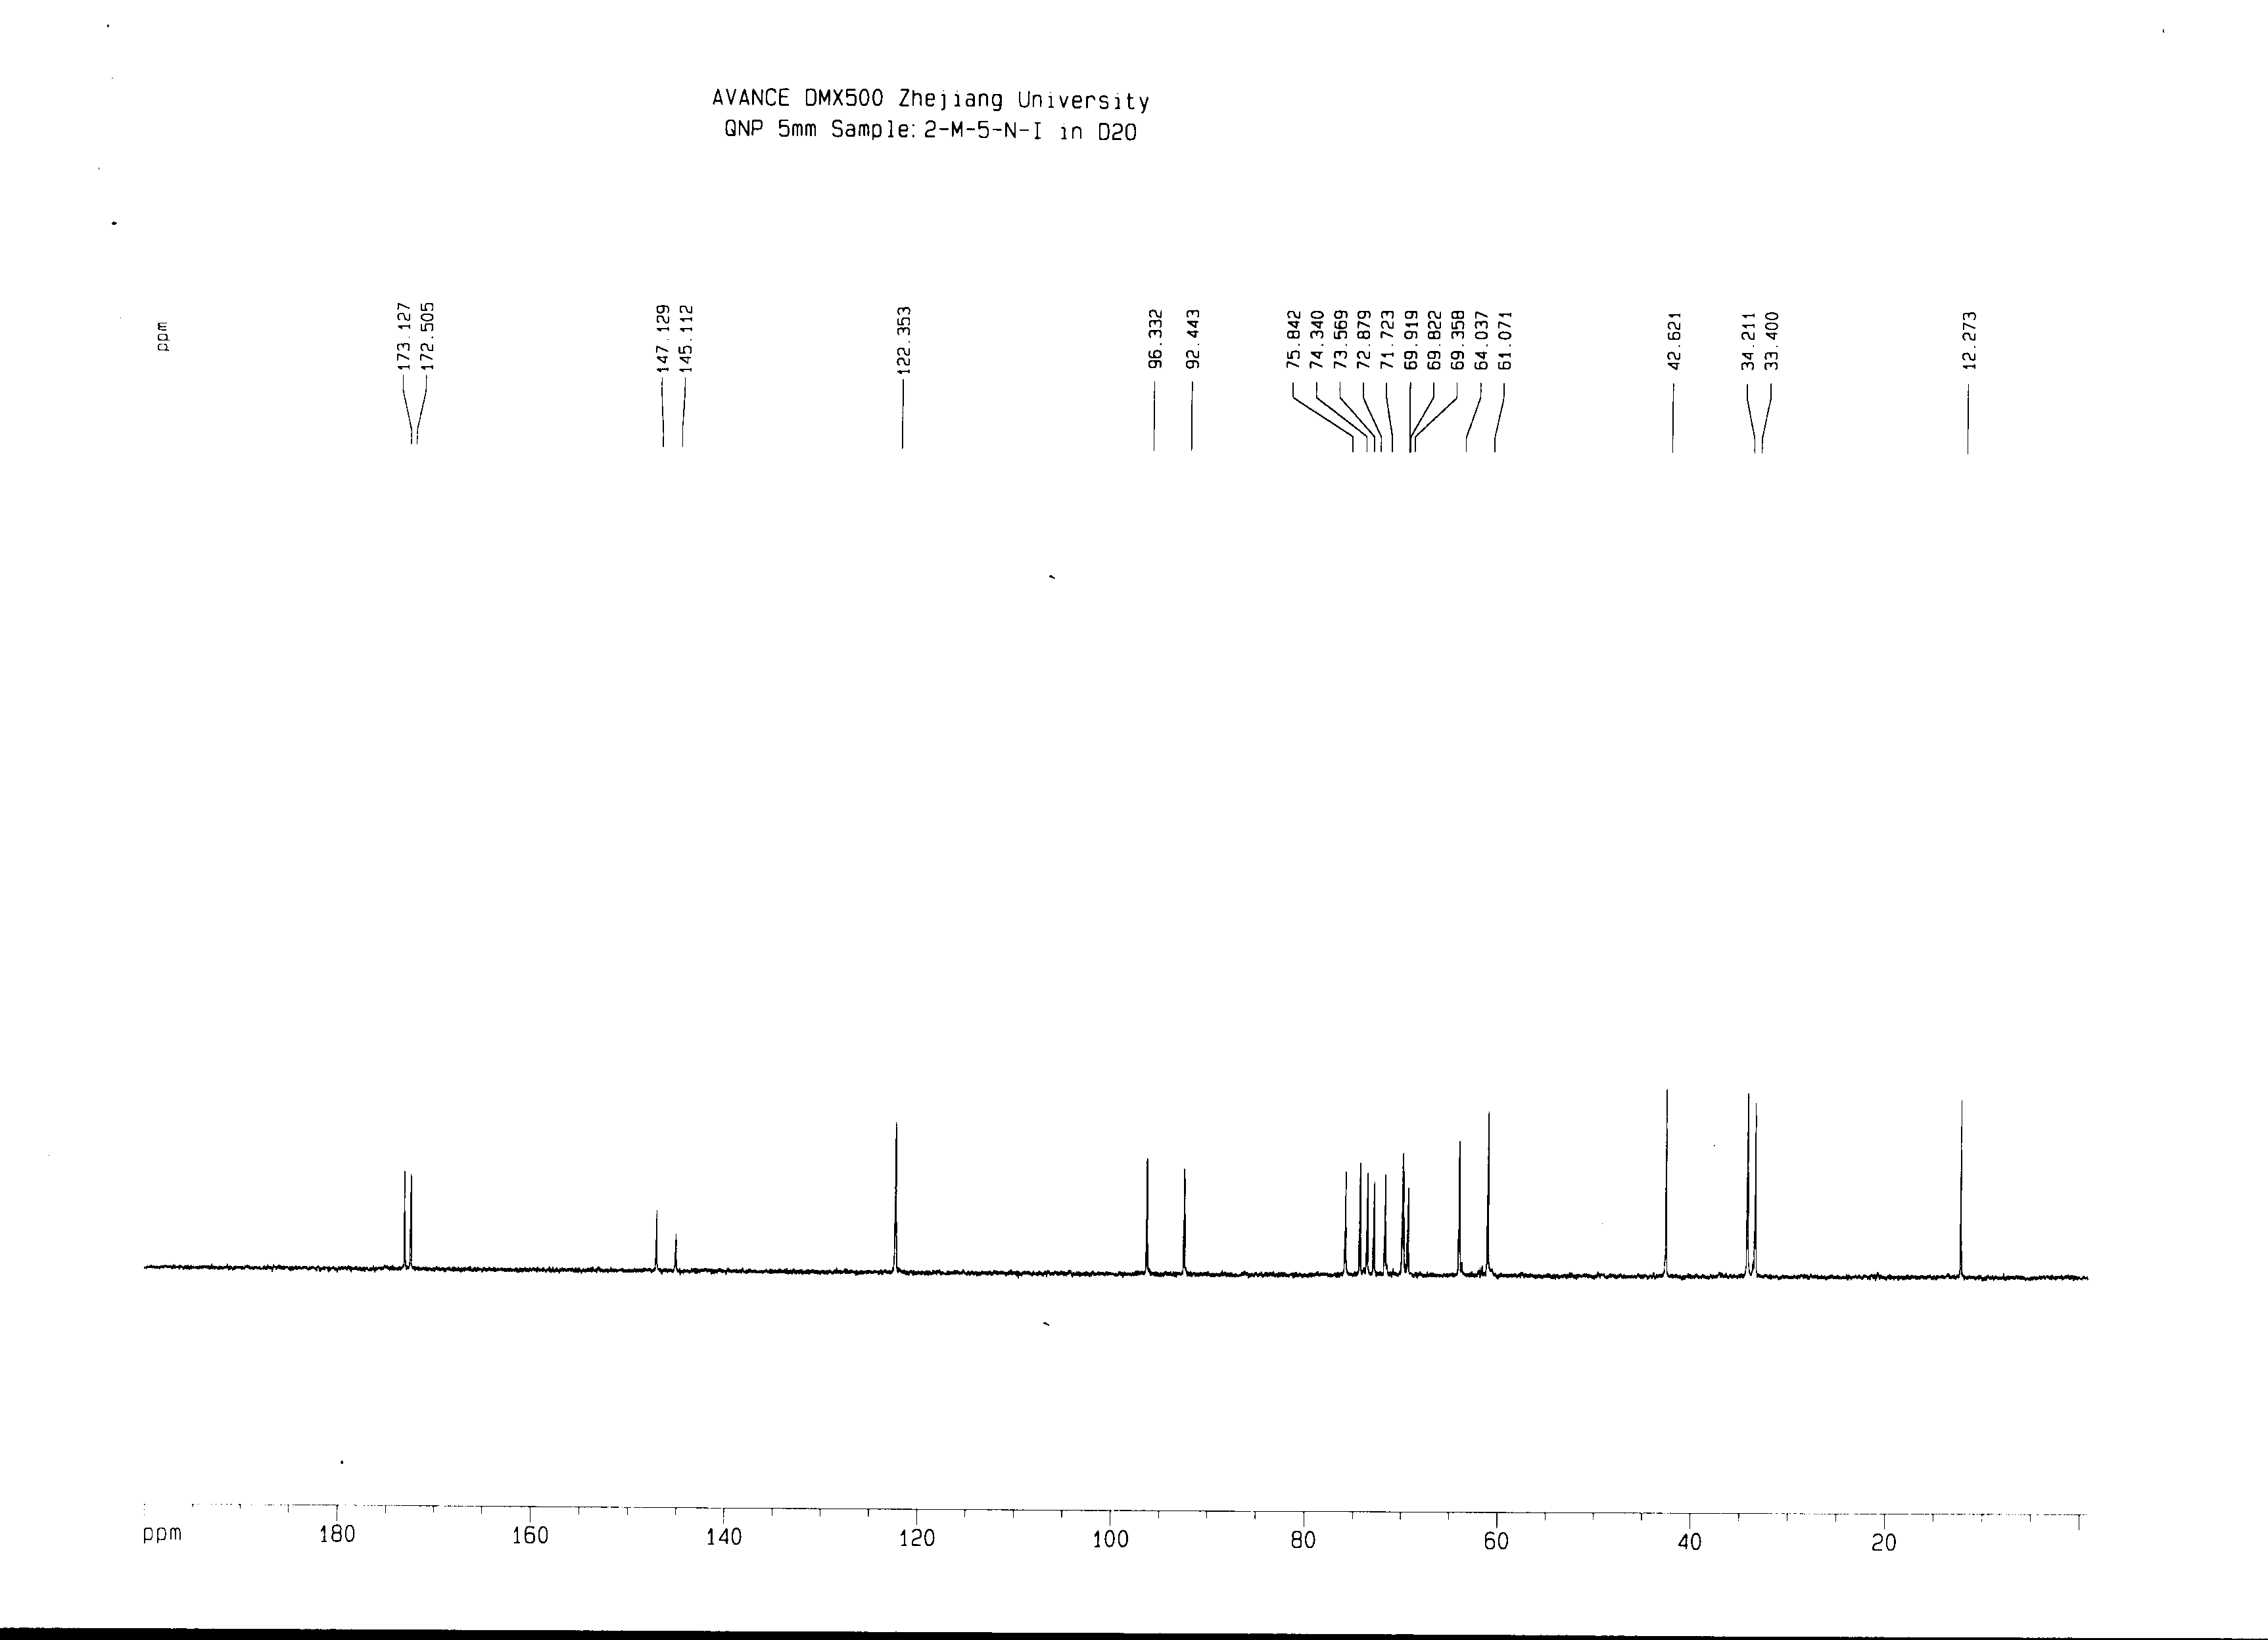
**
